# Supplementary material
Source: PubMed Central journal article supplement (PMC3928658)
Supplement: mmc1.pdf [file mmc1.pdf]

The American Journal of Human Genetics, Volume 94

## **Supplemental Data**

### **Heterozygous Loss-of-Function Mutations**

### **in *YAP1* Cause Both Isolated and Syndromic**

### **Optic Fissure Closure Defects**

**Kathleen A. Williamson, Joe Rainger, James A.B. Floyd, Morad Ansari, Alison Meynert, Kishan V. Aldridge, Jacqueline K. Rainger, Carl A. Anderson, Anthony T. Moore, Matthew E. Hurles, Angus Clarke, Veronica van Heyningen, Alain Verloes, Martin S. Taylor, Andrew O.M. Wilkie, UK10K Consortium, and David R. FitzPatrick**

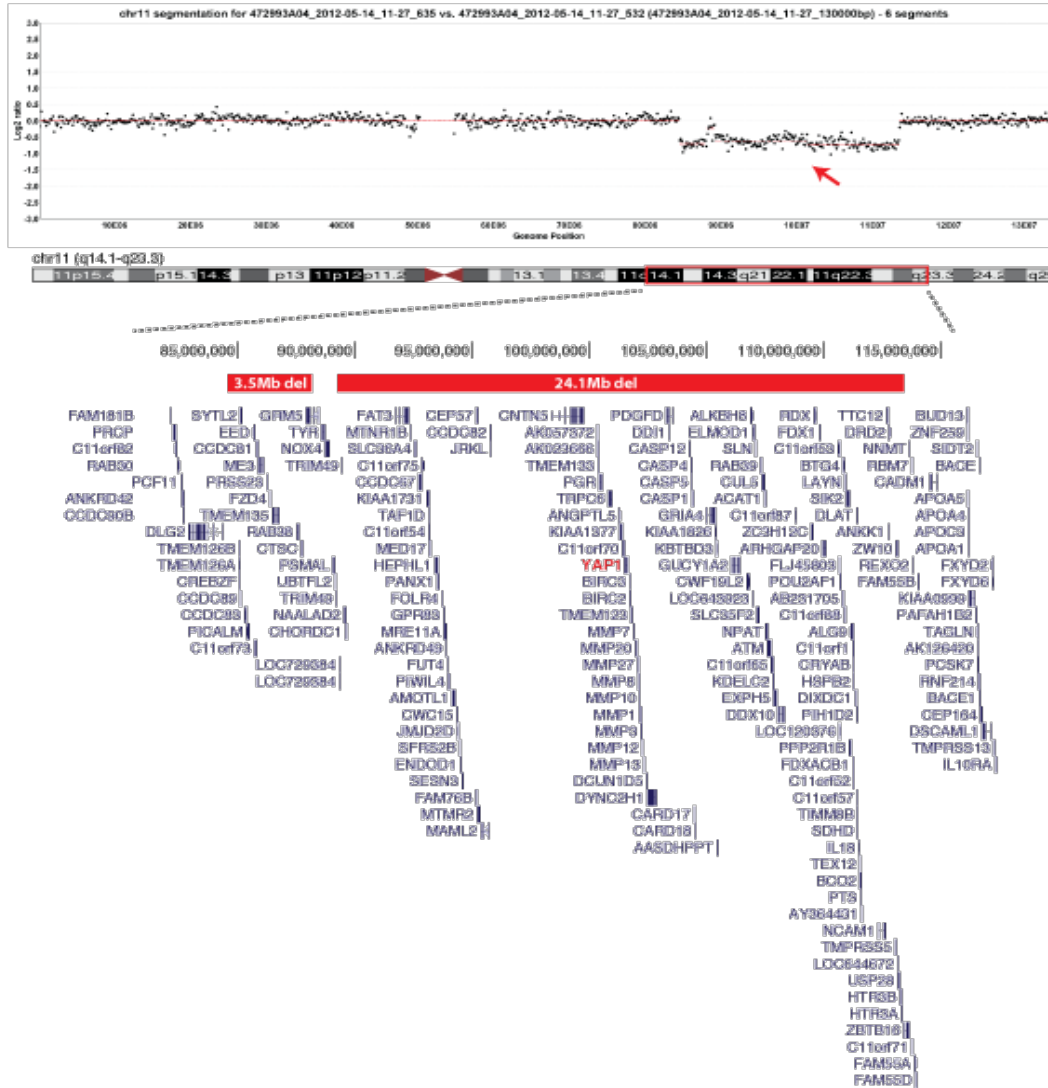

**Figure S1: Schematic diagram showing two heterozygous deletions on chromosome 11q identified by array comparative genomic hybridization (array CGH). A 3.5 Mb deletion (hg19 chr11:84886352-88434352) and a 24.1 Mb deletion (hg19 chr11:89604352-113918790) were identified in F432. The 24.1 Mb deletion resulted in a loss of a single copy of *YAP1*, shown in red. Deletions are marked by red bars and are displayed using hg18 genomic coordinates in this figure. These genomic variants have been entered into the DECIPHER database as case number 282360.**

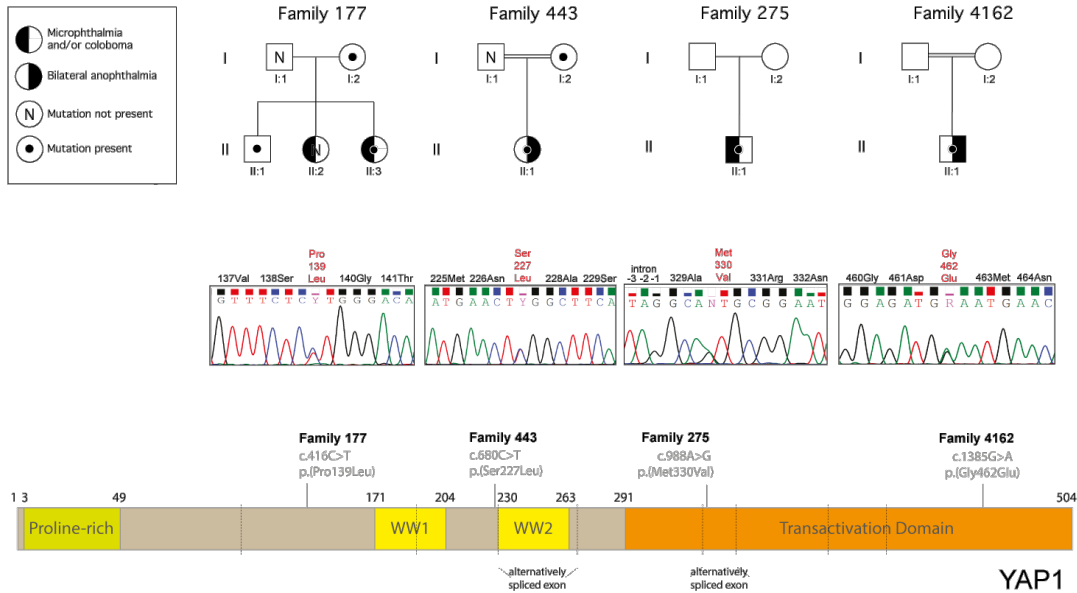

**Figure S2: YAP1 missense mutations.**

Pedigrees of the four families with rare missense mutations in *YAP1*. Representative chromatograms from Sanger sequencing of the heterozygous mutation are below each pedigree and the position of each mutation is indicated on the cartoon of the protein structure in the bottom panel. As can be seen in Family 177 the mutation does not segregate with the phenotype. In Family 443 the mother carries the mutation but is unaffected. In Families 275 and 4162 there is a single heterozygous proband but the parents are not available for testing.



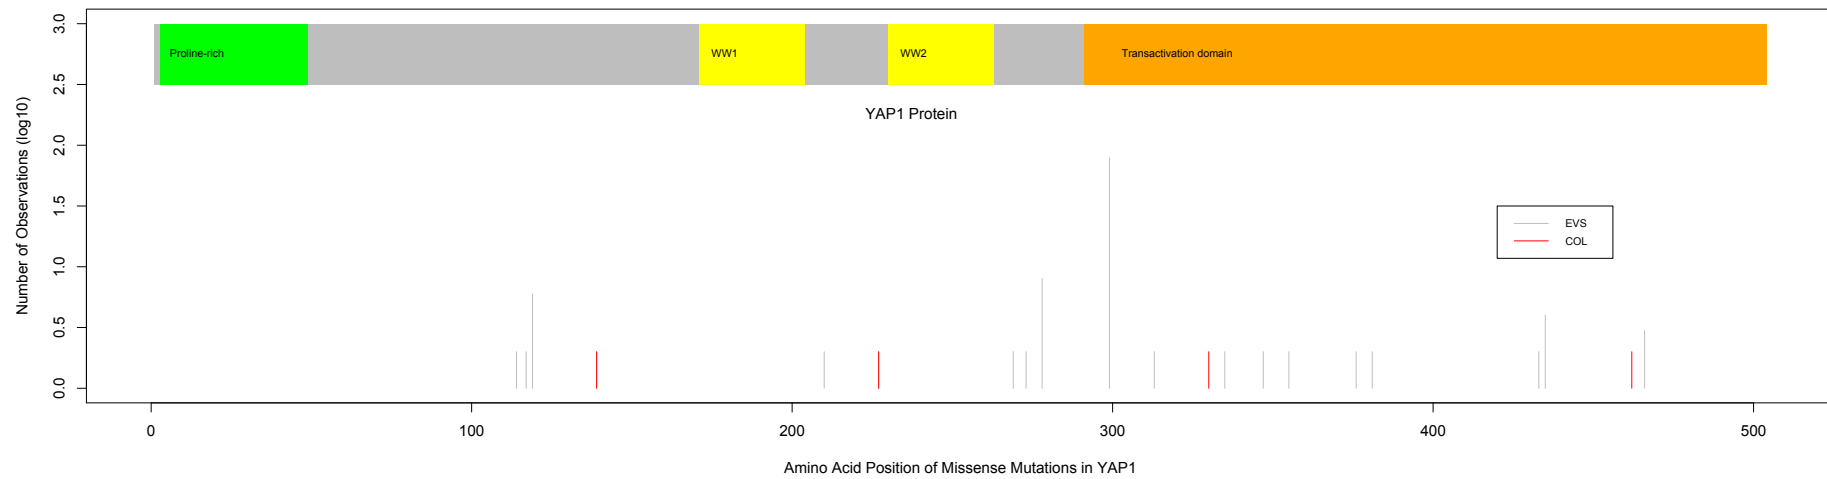

**Figure S4: Distribution of YAP1 substitutions encoded by single nucleotide variants (SNV)**

Graphical representation of the position and log(10) frequency of missense variants derived from EVS data (gray lines). The missense variants identified in the UK10K coloboma exome data and resequencing data are shown in red. No clustering of the missense variants present in either group is apparent.

**Table S1: Oligonucleotides used to amplify *YAP1* from gDNA and *Yap1* & *YAP1* from cDNA.**

|                      | forward oligonucleotide 5'→3'                         | reverse oligonucleotide 5'→3'                       | amplicon length, bp / species |
|----------------------|-------------------------------------------------------|-----------------------------------------------------|-------------------------------|
| <b>gDNA template</b> |                                                       |                                                     |                               |
| <i>YAP1</i> exon 1   | <b>GTAGCGCGACGGCCAGT</b> CCCTGAGAGCGAGGACAG           | <b>CAGGGCGCAGCGATGAC</b> CCCTGACCAGAGCTGGCG         | 580                           |
| <i>YAP1</i> exon 2   | <b>GTAGCGCGACGGCCAGT</b> AACCTGTGTTCTCCAGTGTGG        | <b>CAGGGCGCAGCGATGAC</b> CCCATACTAACAAAGGTATTTAGGTC | 499                           |
| <i>YAP1</i> exon 3   | <b>GTAGCGCGACGGCCAGT</b> GCACCCTTTGATTATGAGCC         | <b>CAGGGCGCAGCGATGAC</b> CACATCAACTTTTACCAATGCG     | 301                           |
| <i>YAP1</i> exon 4   | <b>GTAGCGCGACGGCCAGT</b> CCTTTCTTCTCTGAACACAGCC       | <b>CAGGGCGCAGCGATGAC</b> GTA AACATTGGGTGGGCAG       | 434                           |
| <i>YAP1</i> exon 5   | <b>GTAGCGCGACGGCCAGT</b> CATCGAATATCCCAAATTGC         | <b>CAGGGCGCAGCGATGAC</b> CCA ACTTTAAGAAAACAAACCCC   | 373                           |
| <i>YAP1</i> exon 6   | <b>GTAGCGCGACGGCCAGT</b> AAGTCAGCCTACACAGCCAG         | <b>CAGGGCGCAGCGATGAC</b> AGGACAGGACCCTGGAATG        | 241                           |
| <i>YAP1</i> exon 7   | <b>GTAGCGCGACGGCCAGT</b> GGT TACTCTGATGAACGTTTTATTTTC | <b>CAGGGCGCAGCGATGAC</b> GGCCCACACAGATGTTCC         | 357                           |
| <i>YAP1</i> exon 8   | <b>GTAGCGCGACGGCCAGT</b> TCTTTGAGAATTATGTTGCTGCTC     | <b>CAGGGCGCAGCGATGAC</b> CCCTGGTGATAACATATCCCCTG    | 306                           |
| <i>YAP1</i> exon 9   | <b>GTAGCGCGACGGCCAGT</b> TGATACAGCCCTGATGTTAGC        | <b>CAGGGCGCAGCGATGAC</b> GCCTGAAA ACTGCAACTGGC      | 426                           |
| <b>cDNA template</b> |                                                       |                                                     |                               |
| Met1                 | GTCATGAACCCCAAGACG                                    | GAGAAACAGCTCCCAACTGC                                | Human                         |
| Met179               | CGGGTTAAGGAGGAGGAAAAG                                 | GGTCAGTGTCCCAGGAGAAA                                | Human                         |
| YAP1                 | CGGGATGTCTCAGGAATTGA                                  | CCAGGAATGGCTTCAAGGTA                                | Human                         |
| β-ACTIN              | GGCATGGGTCAGAAGGATT                                   | GGGGTGTGTAAGGTCTCAA                                 | Human                         |
| m1                   | TTCAATGCCGTCATGAACC                                   | TGTGAGTGTCCCAGGAGAAA                                | Mouse                         |
| m2                   | GCGTTGCAGGTTGACTCATA                                  | TGTGAGTGTCCCAGGAGAAA                                | Mouse                         |
| m3                   | GCGGGATCCTTTTCACTC                                    | TGTGAGTGTCCCAGGAGAAA                                | Mouse                         |
| Yap1                 | ATGCTTTTCGCAACTGAACG                                  | GAGTGATCCTCTGGTTCATGG                               | Mouse                         |
| β-Actin              | TTCTTTGCAGCTCCTTCGTT                                  | CTCGTCACCCACATAGGAGTC                               | Mouse                         |

**Table S2: *In silico* prediction of the pathogenicity of YAP1 non-synonymous variants.**

| Gene                   | Nucleotide change | Protein change | MAF%<br>(from<br>EVS) | Align-<br>GVGD<br>class | PolyPhen-2           |       | SIFT        |       | Mutation Taster    |         |
|------------------------|-------------------|----------------|-----------------------|-------------------------|----------------------|-------|-------------|-------|--------------------|---------|
|                        |                   |                |                       |                         | prediction           | score | prediction  | score | prediction         | p-value |
| NM_001130145.2<br>YAP1 | c.416C>T          | p. (Pro139Leu) | 0                     | C0                      | probably<br>damaging | 0.97  | Tolerated   | 0.41  | Disease<br>causing | 1.0     |
| NM_001130145.2<br>YAP1 | c.680C>T          | p. (Ser227Leu) | 0.0077                | C0                      | benign               | 0.013 | Tolerated   | 0.33  | Disease<br>causing | 0.998   |
| NM_001130145.2<br>YAP1 | c.988A>G          | p. (Met330Val) | 0                     | C0                      | benign               | 0.001 | Tolerated   | 1.00  | Disease<br>causing | 1.0     |
| NM_001130145.2<br>YAP1 | c.1385G>A         | p. (Gly462Glu) | 0                     | C0                      | possibly<br>damaging | 0.526 | Deleterious | 0.03  | Disease<br>causing | 0.835   |
